# Supplementary material
Source: PubMed Central journal article supplement (PMC7404817)
Supplement: NIHMS1606747-supplement-Supplemental_material.pdf [file NIHMS1606747-supplement-Supplemental_material.pdf]

**Supplementary Table 1.** Procedures performed at JRSC, by service and procedure class (ambulatory extended recovery or outpatient).

| Service                                                | Procedure Class | Procedure Type                                                        |
|--------------------------------------------------------|-----------------|-----------------------------------------------------------------------|
| Breast                                                 | AXR             | Bilateral mastectomy                                                  |
|                                                        |                 | Bilateral mastectomy with breast reconstruction with tissue expander  |
|                                                        |                 | Chest wall surgery with axillary dissection                           |
|                                                        |                 | Unilateral mastectomy                                                 |
|                                                        |                 | Unilateral mastectomy with breast reconstruction with tissue expander |
|                                                        | Outpatient      | Axillary dissection                                                   |
|                                                        |                 | Bilateral partial mastectomy                                          |
|                                                        |                 | Bilateral partial mastectomy with axillary dissection                 |
|                                                        |                 | Bilateral partial mastectomy with lymph node biopsy                   |
|                                                        |                 | Breast lesion excision                                                |
|                                                        |                 | Breast lesion excision with lymph node biopsy                         |
|                                                        |                 | Breast lymph node biopsy                                              |
|                                                        |                 | Chest wall surgery                                                    |
|                                                        |                 | Chest wall surgery with prosthesis                                    |
|                                                        |                 | Unilateral partial mastectomy                                         |
| Unilateral partial mastectomy with axillary dissection |                 |                                                                       |
| Unilateral partial mastectomy with lymph node biopsy   |                 |                                                                       |
| Dental                                                 | Outpatient      | Extraction                                                            |
|                                                        |                 | Reconstruction                                                        |
| Gastric Mixed Tumor                                    | AXR             | Metatarsal amputation                                                 |
|                                                        |                 | Biopsy or excision of axillary lymph node                             |
|                                                        |                 | Hernia repair                                                         |
|                                                        |                 | Radical resection of tumor                                            |
|                                                        |                 | Axillary lymphadenectomy                                              |
|                                                        | Outpatient      | Lesion excision                                                       |
| Radical resection of tumor                             |                 |                                                                       |
| Wound repair                                           |                 |                                                                       |
| Gynecology                                             | AXR             | Exploration of abdomen                                                |
|                                                        |                 | Exploration of abdomen with robot                                     |
|                                                        |                 | Inguinofemoral lymph node dissection                                  |
|                                                        |                 | Laparoscopic supracervical hysterectomy with robot                    |
|                                                        |                 | Laparoscopy excise lesions with robot                                 |
|                                                        |                 | Myomectomy laparoscopic                                               |
|                                                        |                 | Myomectomy with robot                                                 |
|                                                        |                 | Radical hysterectomy with robot                                       |
|                                                        |                 | Radical TAH with robot                                                |
|                                                        |                 | Removal of adnexal structure with lymph node dissection with robot    |
| Retroperitoneal lymph node dissection with robot       |                 |                                                                       |

|                     |                          |                                                                    |     |
|---------------------|--------------------------|--------------------------------------------------------------------|-----|
|                     |                          | Salpingo-oophorectomy                                              |     |
|                     |                          | Salpingo-oophorectomy with robot                                   |     |
|                     |                          | Sentinel lymph node/laparoscopic lymph node dissection             |     |
|                     |                          | TAH with BSO                                                       |     |
|                     |                          | TAH with BSO with robot                                            |     |
|                     |                          | Total laparoscopic hysterectomy                                    |     |
|                     |                          | Total laparoscopic hysterectomy with robot                         |     |
|                     |                          | Trachelectomy with robot                                           |     |
|                     | Outpatient               | Conization of cervix with/without D&C                              |     |
|                     |                          | D&C                                                                |     |
|                     |                          | Exploration of abdomen                                             |     |
|                     |                          | Hysteroscopy with D&C                                              |     |
|                     |                          | Inguinofemoral lymph node dissection                               |     |
|                     |                          | Laparoscopy excise lesions                                         |     |
|                     |                          | Myomectomy                                                         |     |
|                     |                          | Myomectomy laparoscopic                                            |     |
|                     |                          | Myomectomy with robot                                              |     |
|                     |                          | Oophorectomy with robot                                            |     |
|                     |                          | Ovarian cystectomy with robot                                      |     |
|                     |                          | Removal of adnexal structure laparoscopic with/without D&C         |     |
|                     |                          | Removal of adnexal structure with lymph node dissection with robot |     |
|                     |                          | Removal of adnexal structure with lysis                            |     |
|                     |                          | Removal of adnexal structure with lysis with robot                 |     |
|                     |                          | Removal of adnexal structure with/without D&C with robot           |     |
|                     |                          | Retroperitoneal lymph node dissection                              |     |
|                     |                          | Salpingo-oophorectomy                                              |     |
|                     |                          | Salpingo-oophorectomy with robot                                   |     |
|                     |                          | Vaginectomy partial                                                |     |
|                     |                          | Vulvectomy                                                         |     |
|                     |                          | Vulvectomy partial                                                 |     |
|                     |                          | Head and Neck                                                      | AXR |
|                     | Hemiglossectomy          |                                                                    |     |
|                     | Parotid tumor excision   |                                                                    |     |
| Rhinectomy partial  |                          |                                                                    |     |
| Thyroid/parathyroid |                          |                                                                    |     |
| Outpatient          | Cervical lymphadenectomy |                                                                    |     |
|                     | Hemiglossectomy          |                                                                    |     |
|                     | Rhinectomy partial       |                                                                    |     |
|                     |                          |                                                                    |     |
| Plastics            | Outpatient               | Bilateral breast implant                                           |     |
|                     |                          | Bilateral breast prosthesis                                        |     |
|                     |                          | Bilateral breast reconstruction with tissue expander               |     |
|                     |                          | Bilateral breast reduction                                         |     |
|                     |                          | Bilateral nipple areola reconstruction                             |     |
|                     |                          | Bilateral revise breast reconstruction                             |     |
|                     |                          | I&D hematoma/fluid                                                 |     |

|            |                             |                                                                                |
|------------|-----------------------------|--------------------------------------------------------------------------------|
|            |                             | Unilateral breast implant                                                      |
|            |                             | Unilateral breast prosthesis                                                   |
|            |                             | Unilateral breast prosthesis with nipple reconstruction                        |
|            |                             | Unilateral breast reconstruction with tissue expander                          |
|            |                             | Unilateral breast reduction                                                    |
|            |                             | Unilateral nipple areola reconstruction                                        |
|            |                             | Unilateral replacement tissue expander with permanent prostheses               |
|            |                             | Unilateral revise breast reconstruction                                        |
| Urology    | AXR                         | Adrenalectomy with robot                                                       |
|            |                             | Artificial urinary sphincter                                                   |
|            |                             | Bilateral pelvic lymph node dissection laparoscopic                            |
|            |                             | Bilateral pelvic lymph node dissection with robot                              |
|            |                             | Cystectomy partial with robot                                                  |
|            |                             | Cystocele repair                                                               |
|            |                             | Female sling                                                                   |
|            |                             | Inflatable penile prostheses                                                   |
|            |                             | Male sling                                                                     |
|            |                             | Nephrectomy laparoscopic                                                       |
|            |                             | Nephrectomy partial laparoscopic                                               |
|            |                             | Nephrectomy partial with robot                                                 |
|            |                             | Nephrectomy with robot                                                         |
|            |                             | Nephroureterectomy laparoscopic                                                |
|            |                             | Nephroureterectomy with robot                                                  |
|            |                             | Prostatectomy radical laparoscopic with bilateral pelvic lymph node dissection |
|            |                             | Prostatectomy radical with bilateral pelvic lymph node dissection with robot   |
|            |                             | Prostatectomy radical with robot                                               |
|            |                             | Retroperitoneal lymph node dissection laparoscopic                             |
|            |                             | Retroperitoneal lymph node dissection with robot                               |
|            | Sacral colpopexy with robot |                                                                                |
| TURP       |                             |                                                                                |
| Outpatient | Urology OP Other            |                                                                                |
